# Supplementary material for: Screening of Diabetic Retinopathy Using Teleophthalmology to Complement Human Resources for Eye Health: A Systematic Review and Meta-Analysis
Source: MDPI journal article supplement (doi:10.3390/clinpract12040050), 2022-06-29
Supplement: s1 [file s1]

## Supplementary file 1A

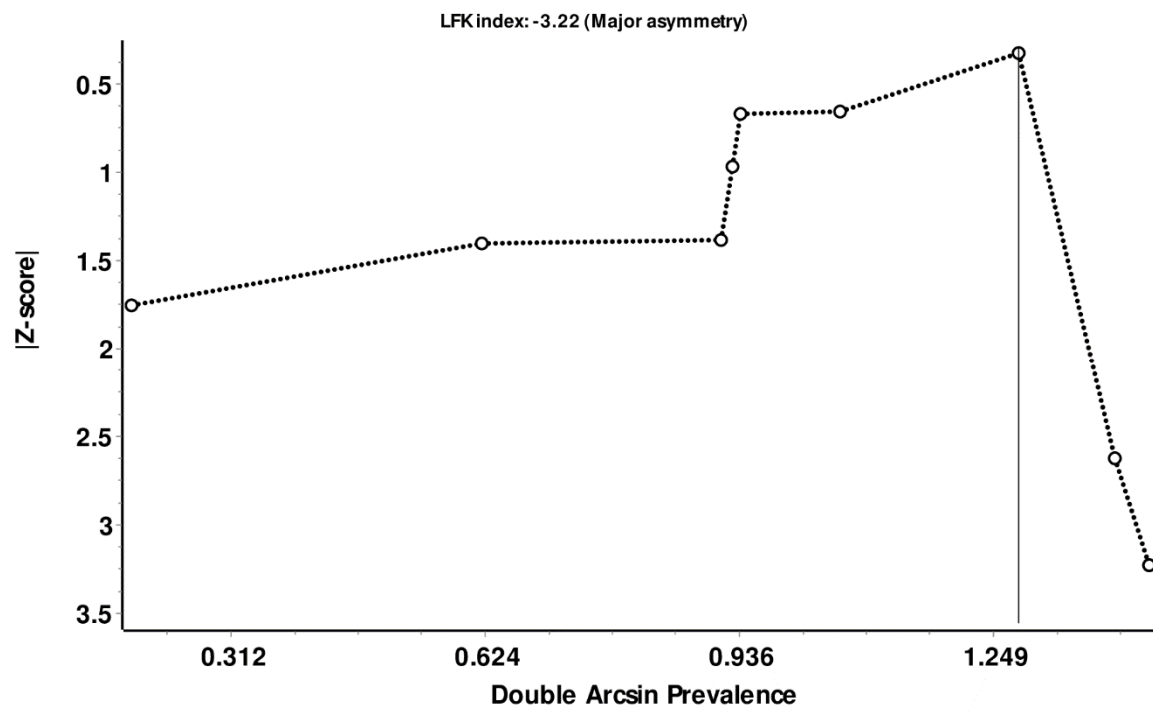

Figure S1A: Doi plot showing:

## Supplementary file 1B

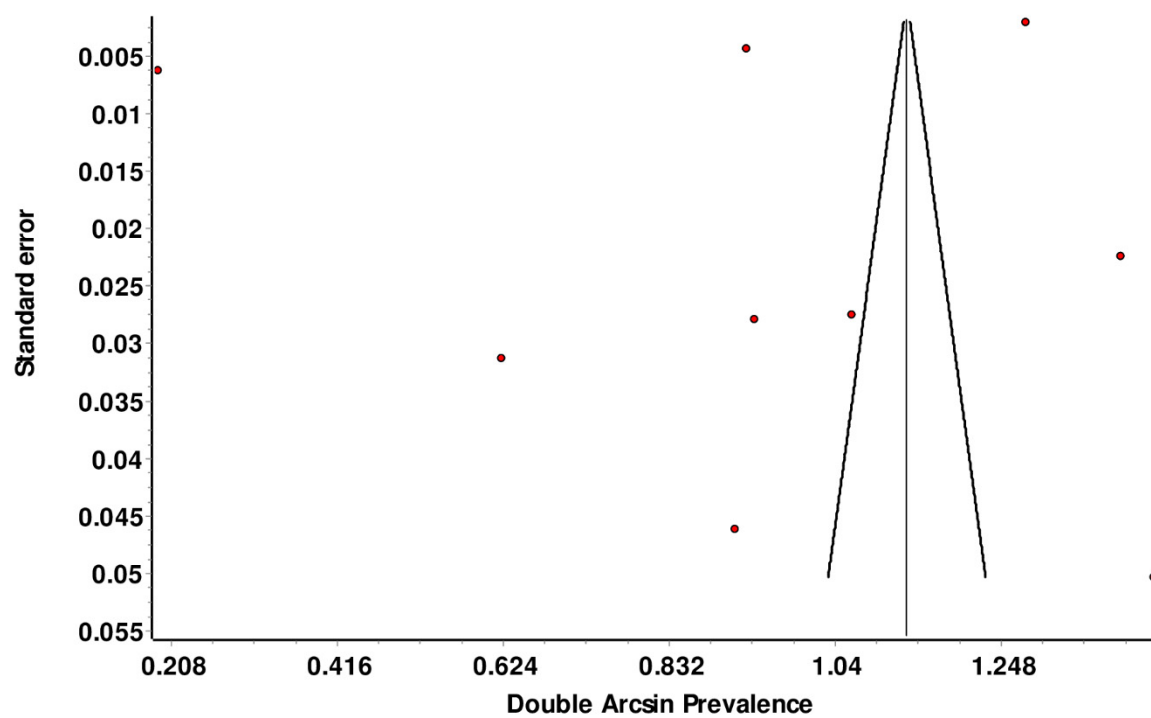

Figure S1B: Funnel plot showing: publication bias
